# Supplementary material for: Reliable In Silico Identification of Sequence Polymorphisms and Their Application for Extending the Genetic Map of Sugar Beet (Beta vulgaris)
Source: PLoS One. 2014 Oct 10;9(10):e110113. doi: 10.1371/journal.pone.0110113 (PMC4193868; doi:10.1371/journal.pone.0110113)
Supplement: Table S3 — Scoring data from new markers and F2 individuals for genetic mapping. In the ABH table scoring the K1P1 allele leads to an A, the K1P2 allele corresponds to B and heterozygous calls lead to H. (XLSX) [file pone.0110113.s004.xlsx]

## Sheet: Blatt1
MARKER_ID	KWS1_F2_1-3504	KWS1_F2_1-3505	KWS1_F2_1-3506	KWS1_F2_1-3507	KWS1_F2_1-3508	KWS1_F2_1-3509	KWS1_F2_1-3510	KWS1_F2_1-3511	KWS1_F2_1-3512	KWS1_F2_1-3513	KWS1_F2_1-3514	KWS1_F2_1-3515	KWS1_F2_1-3516	KWS1_F2_1-3517	KWS1_F2_1-3518	KWS1_F2_1-3519	KWS1_F2_1-3520	KWS1_F2_1-3521	KWS1_F2_1-3522	KWS1_F2_1-3523	KWS1_F2_1-3524	KWS1_F2_1-3525	KWS1_F2_1-3526	KWS1_F2_1-3527	KWS1_F2_1-3528	KWS1_F2_1-3529	KWS1_F2_1-3530	KWS1_F2_1-3531	KWS1_F2_1-3532	KWS1_F2_1-3533	KWS1_F2_1-3534	KWS1_F2_1-3535	KWS1_F2_1-3536	KWS1_F2_1-3537	KWS1_F2_1-3538	KWS1_F2_1-3539	KWS1_F2_1-3540	KWS1_F2_1-3541	KWS1_F2_1-3542	KWS1_F2_1-3543	KWS1_F2_1-3544	KWS1_F2_1-3545	KWS1_F2_1-3546	KWS1_F2_1-3547	KWS1_F2_1-3548	KWS1_F2_1-3549	KWS1_F2_1-3550	KWS1_F2_1-3551	KWS1_F2_1-3552
BB00627	B	-	H	H	H	B	B	A	H	B	A	A	H	B	H	H	H	A	B	H	B	A	H	B	H	B	A	A	H	H	B	A	A	A	H	H	H	A	H	H	A	-	B	A	H	B	H	A	B
BB00769	B	B	B	B	-	B	B	B	B	A	H	H	B	B	A	B	B	H	H	B	B	B	H	H	A	A	A	A	B	B	H	H	B	H	H	B	B	B	A	H	B	-	-	H	B	H	B	H	B
BB00938	B	A	H	B	H	B	H	H	H	H	H	B	B	A	B	B	H	B	H	H	H	H	H	H	H	H	B	H	A	H	A	H	H	A	H	A	A	H	B	H	H	H	B	B	A	H	B	B	A
BB01194	A	A	H	A	A	H	H	A	A	H	H	H	B	H	B	B	A	H	H	H	A	A	H	H	B	H	A	H	H	H	A	A	B	H	H	B	H	H	B	B	H	H	H	H	H	H	A	A	H
BB01280	H	H	H	H	H	H	A	H	B	B	H	H	A	A	B	A	H	H	H	H	A	H	B	B	A	H	A	B	B	-	A	B	A	B	B	B	H	A	H	A	A	-	-	A	A	H	H	A	H
BB01630	A	A	H	A	A	H	H	A	A	H	H	H	B	H	B	B	A	H	H	H	A	A	H	H	B	H	A	H	H	H	A	A	B	H	H	B	H	H	B	B	H	H	H	H	H	H	A	A	H
BB01871	B	H	H	B	H	B	H	H	A	A	H	-	B	A	H	B	B	B	H	B	H	B	H	B	H	H	B	H	A	B	H	H	A	A	H	A	H	H	H	H	H	H	B	B	A	H	B	B	A
BB01971	-	A	H	H	H	B	H	A	H	B	H	A	A	B	B	A	H	A	B	H	B	A	H	B	H	B	H	A	H	-	B	H	A	A	B	H	A	A	-	-	A	-	-	A	H	B	B	A	B
BB01984	A	H	H	H	H	H	H	H	B	H	H	H	A	A	B	A	H	H	H	H	A	H	B	B	A	H	A	B	B	H	A	B	A	H	B	B	H	A	H	A	A	-	-	A	A	H	H	A	H
BB02185	A	H	H	H	H	H	H	H	B	H	H	H	A	A	B	A	H	H	H	H	A	H	B	B	A	H	A	B	B	H	A	B	A	H	B	B	H	A	H	A	A	-	A	A	A	H	H	A	H
BB02226	-	-	H	A	B	H	B	A	H	A	H	H	B	H	H	B	H	H	H	B	A	A	A	A	B	B	H	H	H	H	H	H	B	A	B	H	H	A	A	B	A	-	B	H	H	H	H	H	B
BB02247	H	H	H	A	A	H	H	H	A	H	H	B	B	H	B	H	A	B	B	H	A	H	B	H	B	A	A	A	H	H	A	H	H	A	H	H	B	H	H	H	H	-	B	B	H	A	A	H	H
BB02493	H	H	A	H	H	H	A	B	A	A	H	-	H	H	-	H	A	H	H	A	H	H	-	B	A	H	H	B	H	H	B	A	H	A	H	H	H	H	H	B	H	-	-	B	H	A	H	H	-
BB02620	A	B	H	H	H	B	H	H	B	H	A	H	-	H	H	A	H	H	B	H	A	H	H	H	H	H	A	B	B	H	A	H	H	H	H	B	B	H	H	H	H	-	-	B	H	H	H	H	A
BB02714	H	H	H	A	A	A	H	H	A	H	H	B	B	H	B	H	A	B	B	H	A	H	B	H	B	A	A	A	H	H	A	H	H	A	H	H	B	H	H	H	H	-	B	H	H	A	A	H	H
BB02743	A	H	H	H	H	H	H	H	B	H	H	H	A	A	B	A	H	H	H	H	A	H	B	B	A	H	A	B	B	H	A	B	A	H	B	B	H	A	H	A	A	-	A	A	A	H	H	A	H
BB02777	H	H	H	H	H	H	H	B	B	B	H	H	H	A	B	B	H	A	H	A	A	A	B	B	B	H	B	H	A	H	B	B	B	A	H	H	A	B	H	A	H	B	A	A	A	B	H	B	B
BB02932	H	H	H	H	H	A	A	B	B	B	H	H	A	A	B	A	H	H	H	H	A	H	B	B	A	H	A	B	B	H	A	B	A	B	B	B	H	A	A	A	A	-	-	A	A	H	H	A	H
BB02972	-	B	B	B	H	H	B	B	B	A	H	-	H	B	A	H	B	B	H	H	B	B	H	H	H	H	A	H	B	B	H	H	B	H	H	B	B	H	H	H	H	-	-	H	B	-	H	H	B
BB03429	H	H	H	H	H	H	H	B	B	B	H	H	H	A	B	B	H	A	H	A	H	H	B	B	B	H	B	H	A	H	B	B	B	A	H	H	H	B	H	A	H	-	-	A	A	B	H	B	B
BB03947	A	B	H	B	H	B	H	H	B	H	A	H	H	H	H	A	H	H	H	H	A	H	H	H	H	H	A	H	B	H	A	H	H	H	H	H	B	H	H	H	B	B	B	H	H	H	A	H	A
BB04402	H	A	H	A	B	H	B	A	H	A	H	H	B	H	H	B	H	H	H	B	A	A	A	A	B	B	H	H	H	H	H	H	B	A	B	H	H	A	A	B	A	-	-	H	H	B	H	H	B
BB04458	H	B	H	H	B	H	H	B	B	B	H	H	H	A	B	B	H	H	H	-	A	H	B	B	H	A	B	A	A	H	B	B	B	A	H	B	A	B	H	A	H	-	A	H	A	B	H	H	B
BB04606	A	B	H	H	B	H	H	B	B	B	H	H	H	A	B	B	-	H	H	A	A	-	H	H	H	A	B	A	A	H	H	B	B	A	H	B	H	H	H	A	H	A	A	H	A	B	H	H	B
BB04633	-	H	H	H	H	H	H	B	B	B	H	H	H	A	B	B	H	A	H	A	H	H	B	B	B	-	B	H	A	H	B	B	B	A	H	H	H	B	H	A	H	-	A	A	A	B	H	B	B
BB04675	H	B	H	H	B	H	H	B	B	B	H	H	H	A	B	B	H	A	H	A	A	A	B	B	H	A	B	H	A	H	B	B	B	A	H	B	A	B	H	A	H	-	-	A	A	B	H	H	B
BB04794	H	B	H	H	-	H	H	B	B	B	H	H	H	A	B	B	H	H	H	A	A	H	B	B	H	A	B	A	A	-	B	B	B	-	H	B	A	B	H	A	H	-	-	H	A	B	H	H	B
BB04875	-	H	H	H	H	H	H	H	B	H	H	H	-	A	B	A	H	H	H	H	-	H	B	B	A	H	A	B	B	H	A	B	A	H	B	B	H	A	H	A	A	-	-	A	A	H	H	A	H
BB04898	A	B	H	B	H	B	A	H	B	H	A	H	H	H	H	A	H	H	H	H	A	H	H	H	H	H	H	H	B	H	A	B	H	H	H	H	H	A	H	H	B	-	-	H	H	H	A	H	H
BB05187	B	H	H	B	H	B	H	H	A	A	H	B	B	H	H	B	B	B	H	A	B	B	H	B	H	H	B	H	H	B	H	H	A	A	H	A	H	H	H	H	H	-	-	H	A	B	B	B	A
BB05490	B	B	B	B	H	H	B	B	B	A	H	-	H	B	A	H	B	B	H	H	B	H	H	H	H	H	A	H	B	B	H	H	B	H	H	B	B	H	H	B	H	-	-	H	B	H	H	H	B
BB05793	A	B	H	B	H	B	H	H	B	H	A	H	H	H	H	A	H	H	H	H	A	H	H	H	H	H	A	H	B	H	A	H	H	H	H	H	B	H	H	H	B	-	B	H	H	H	A	H	A
BB05869	H	B	H	H	B	H	H	B	B	B	H	H	H	A	B	B	H	H	H	A	A	H	B	B	H	A	B	-	A	H	B	B	B	A	H	B	A	B	H	A	H	-	-	H	A	B	H	H	B
BB06143	B	H	H	B	H	B	H	H	A	A	H	-	B	A	H	B	B	B	H	B	H	B	H	B	H	H	B	H	A	B	H	H	A	A	H	A	H	H	H	H	H	-	-	B	A	H	B	B	A
BB06253	B	H	A	A	H	B	H	H	H	A	A	H	H	A	H	H	H	H	H	B	A	H	B	H	A	A	H	H	H	H	H	B	H	H	H	A	A	H	A	H	H	-	B	H	A	A	B	A	H
BB06287	H	A	H	A	H	H	B	A	H	A	B	-	B	H	B	B	H	H	H	B	A	A	H	A	B	B	H	H	H	H	H	H	B	A	B	H	H	A	H	B	A	H	B	H	A	H	A	H	B
BB06464	H	B	H	H	B	H	H	B	B	B	H	H	H	A	B	B	H	H	H	A	A	H	B	B	H	A	B	A	A	H	B	B	B	A	H	B	A	B	H	A	H	-	-	H	A	B	H	H	B
BB06528	H	H	B	H	A	B	A	B	H	H	H	A	A	B	B	B	A	B	H	A	A	H	H	H	H	B	A	H	H	H	B	B	H	B	A	A	H	H	A	B	H	-	-	H	B	H	H	H	H
BB07081	A	B	H	B	H	B	H	H	B	H	A	H	H	H	H	A	H	H	H	H	A	H	H	H	H	H	A	H	B	H	A	H	H	H	H	H	B	H	H	H	B	-	-	H	H	H	A	-	A
BB07259	-	-	H	H	B	H	H	B	B	B	H	H	H	A	B	B	H	H	H	A	A	H	B	B	H	A	B	A	A	H	B	B	B	A	H	B	A	B	H	A	H	-	A	H	A	B	H	H	B
BB07484	B	B	B	B	-	H	B	B	H	A	H	-	H	B	A	H	B	B	H	H	B	H	H	H	H	H	A	H	B	B	H	H	B	H	H	B	B	H	H	B	H	-	-	H	B	H	H	H	B
BB07524	B	H	H	B	H	B	H	H	A	A	H	-	B	H	H	B	B	B	H	H	B	B	H	B	H	H	B	H	A	B	H	H	A	A	H	A	H	H	H	H	H	-	B	B	A	B	B	B	A
BB07651	A	B	H	H	B	B	H	H	B	B	A	A	H	A	B	H	A	B	H	A	H	H	H	B	H	A	B	A	H	H	H	B	H	H	H	B	H	B	H	A	H	-	A	H	H	B	H	H	B
BB07707	H	H	A	H	A	A	A	B	H	B	B	A	A	A	H	H	A	A	H	B	A	H	B	H	A	H	A	H	H	H	H	B	A	H	B	H	H	H	H	H	H	-	-	A	A	B	H	A	H
BB08052	B	A	H	H	H	B	H	A	H	B	H	A	A	B	B	H	H	A	B	H	B	A	H	B	H	B	H	A	H	H	B	H	A	A	B	H	A	A	H	H	A	-	-	A	H	B	B	A	B
BB08275	H	H	H	H	H	H	H	A	H	B	H	H	H	H	B	A	H	A	H	A	H	A	A	B	A	B	B	A	A	B	H	H	H	B	H	H	A	B	B	H	A	H	A	A	A	B	B	H	A
BB08343	B	H	H	H	H	B	H	A	H	B	H	A	A	B	B	A	H	A	B	H	B	A	H	B	H	B	H	A	H	H	B	H	A	A	B	H	A	A	H	H	A	-	-	A	H	B	B	H	B
BB08455	B	H	H	B	H	B	H	H	A	A	H	-	B	A	H	B	B	B	H	B	H	H	H	B	H	H	B	H	A	H	H	H	A	A	H	A	H	H	H	H	H	H	B	B	A	H	B	B	A
BB08542	H	H	B	H	-	H	H	B	H	A	H	-	H	B	A	H	B	B	H	H	B	H	H	B	H	H	H	H	H	B	H	H	B	H	H	B	B	H	A	-	H	-	-	H	B	A	H	H	H
BB08667	A	H	H	B	H	H	A	H	B	H	A	-	B	A	H	A	H	H	H	B	H	H	H	H	H	H	B	H	H	H	A	H	H	H	H	H	H	A	A	A	B	-	B	B	H	B	A	A	H
BB09015	A	B	H	H	H	B	-	H	B	H	A	H	H	H	H	A	H	H	H	H	A	H	H	H	H	H	-	H	B	H	A	H	H	H	H	H	B	H	H	H	B	-	B	H	H	H	A	H	A
BB09034	A	B	H	B	H	B	H	H	B	H	A	H	H	H	H	A	H	H	H	H	A	H	H	H	H	H	A	H	B	H	A	H	H	H	H	H	B	H	H	H	B	B	B	H	H	H	A	H	A
BB09055	A	B	H	H	B	B	H	H	B	B	H	-	H	A	B	H	A	H	H	A	H	B	H	H	H	A	B	A	A	H	H	B	H	H	H	B	H	B	H	A	H	-	-	H	H	B	H	H	B
BB09362	A	A	H	A	A	H	H	A	A	H	H	H	B	H	H	B	A	H	A	H	A	A	H	H	B	H	A	H	H	H	A	A	B	H	H	B	H	A	B	B	H	-	-	H	H	H	A	A	H
BB09373	A	H	H	H	H	H	H	H	B	H	H	H	A	A	B	A	H	H	H	H	A	H	B	B	A	H	A	B	B	H	A	B	A	H	B	B	H	A	H	A	A	-	A	A	A	H	H	A	H
BB09407	A	B	H	B	H	B	A	H	B	H	A	-	H	H	H	A	H	H	H	H	A	H	H	H	H	H	H	H	B	H	A	B	H	H	H	H	H	A	H	H	B	-	B	H	H	H	A	H	H
BB09515	B	H	H	A	-	H	H	B	-	H	A	H	H	A	-	H	H	H	B	B	A	H	H	H	B	A	H	H	H	A	H	H	H	A	H	A	A	H	A	H	H	-	B	B	H	A	-	A	H
BB09663	B	A	H	H	H	B	H	A	H	B	H	A	A	B	-	A	H	A	B	H	B	A	H	B	H	B	H	A	H	H	B	H	A	A	B	H	A	A	H	H	A	-	-	A	H	B	-	A	B
BBBK003	A	B	H	H	H	B	H	H	B	H	A	H	H	H	H	A	H	H	H	H	A	H	H	H	H	H	A	H	B	H	A	H	H	H	H	H	B	H	H	H	B	H	B	H	H	H	A	H	A
EB01141	H	H	H	A	A	A	H	H	A	H	H	B	B	H	B	H	A	B	B	H	A	H	B	H	B	A	A	A	H	H	A	H	H	A	H	H	B	H	H	H	H	H	B	H	H	A	A	H	H
EB01143	A	H	H	H	H	H	H	H	B	H	H	H	A	A	B	A	H	H	H	H	A	H	H	B	A	H	A	B	B	H	A	B	A	H	B	B	H	A	H	A	A	H	A	A	H	H	H	A	H
EBS0003	H	H	H	H	H	A	A	B	B	B	B	H	A	A	B	H	H	H	H	H	A	H	B	B	A	H	A	B	B	H	A	B	A	B	B	B	B	A	A	A	A	-	-	A	A	H	H	A	H
EBS0004	A	A	H	A	A	H	H	A	A	H	H	H	B	H	B	B	A	H	H	H	A	A	H	H	B	H	A	H	H	H	A	A	B	H	H	B	H	H	B	B	H	-	-	H	H	H	A	A	H
EBS0005	A	H	H	H	H	H	H	H	B	H	H	H	A	A	B	A	H	H	H	H	A	H	B	B	A	H	A	B	B	H	A	B	A	H	B	B	H	A	H	A	A	-	A	A	A	H	H	A	H
EBS0008	B	H	H	A	H	H	H	H	A	H	H	-	H	H	B	A	A	H	B	B	A	H	H	H	B	A	H	A	A	H	H	H	H	A	H	A	H	H	A	H	H	-	B	B	H	A	B	A	H
EBS0011	-	H	A	B	H	B	H	H	H	H	A	-	B	H	-	B	H	B	H	H	H	H	H	H	H	H	B	B	A	H	A	H	H	A	H	A	A	H	B	H	H	-	-	-	A	H	-	B	A
EBS0012	H	B	H	B	B	A	H	A	A	B	B	H	A	H	A	B	B	A	A	H	H	H	B	H	H	H	H	H	B	B	B	A	H	A	H	B	H	A	H	B	A	-	-	B	H	H	H	A	B
EBS0014	H	B	H	H	-	H	H	B	B	B	H	H	H	A	B	B	H	H	H	A	A	H	B	B	H	A	B	A	A	H	B	B	B	A	H	B	A	B	H	A	H	-	A	H	A	B	H	H	B
EBS0015	H	H	H	H	H	H	H	H	B	H	H	H	H	H	H	B	H	A	H	A	H	B	B	B	B	H	B	H	H	H	B	B	B	A	H	H	H	B	H	A	A	-	-	H	H	B	H	H	H
EBS0016	H	H	H	A	A	A	H	H	-	H	H	B	B	H	B	H	A	B	B	H	A	H	B	H	B	A	A	A	H	H	A	H	H	A	H	H	B	H	H	H	H	-	B	H	H	A	A	H	H
EBS0018	B	B	B	B	H	B	H	B	B	A	H	H	B	B	A	B	B	H	H	B	H	B	H	H	A	A	A	A	B	H	H	H	H	H	H	B	B	B	A	H	B	-	A	H	B	H	B	H	B
EBS0019	B	B	B	B	-	H	B	B	B	A	-	-	B	B	A	H	B	B	H	H	B	B	-	H	A	H	A	H	B	-	H	H	B	H	H	B	B	B	H	H	H	-	A	H	B	H	H	H	B
EBS0021	B	H	H	B	-	H	H	H	H	H	A	-	B	H	H	B	H	B	H	H	H	H	H	H	H	H	B	B	A	-	A	H	H	A	H	A	A	H	B	H	H	-	B	B	A	A	B	B	H
EBS0023	B	B	B	B	H	H	B	B	B	A	H	H	B	H	A	H	B	H	H	B	B	B	H	H	A	H	A	A	B	-	H	H	B	H	H	B	B	B	H	H	B	-	-	H	B	H	H	H	B
EBS0024	B	H	H	B	H	B	H	H	A	A	H	-	B	H	H	B	B	B	H	A	B	B	H	B	H	H	B	H	A	B	H	H	A	A	H	A	H	H	H	H	H	-	B	H	A	B	B	B	A
EBS0025	A	B	H	H	B	H	H	B	B	B	-	H	H	A	B	B	H	H	H	A	A	H	H	B	H	A	B	A	A	H	B	B	B	A	H	B	H	H	H	A	H	-	-	H	A	B	H	H	B
EBS0026	A	B	H	B	H	H	A	H	B	H	A	-	H	H	H	A	H	H	H	B	A	B	H	H	H	H	B	H	H	-	A	B	H	H	H	H	H	A	H	H	B	-	B	H	H	H	A	A	H
EBS0027	B	H	H	B	H	B	H	H	A	A	H	-	B	A	H	B	H	B	H	B	H	H	H	H	H	H	B	H	A	-	H	H	A	A	H	A	H	H	B	H	H	-	B	B	A	H	B	B	A
EBS0028	A	H	H	H	H	H	H	H	B	H	H	H	A	A	B	A	H	H	H	H	A	H	B	B	A	H	A	B	B	-	A	B	A	H	-	B	H	A	H	A	A	-	A	A	A	H	H	A	H
EBS0031	H	H	H	A	-	A	H	A	H	B	H	H	H	A	B	H	H	B	H	H	H	A	A	B	H	H	B	A	A	B	H	H	H	B	A	H	A	B	B	H	A	-	-	A	A	A	B	H	A
EBS0032	A	B	H	H	B	H	H	B	B	B	H	H	H	A	B	B	H	H	H	A	A	H	H	B	H	A	B	A	A	H	B	B	B	A	H	B	A	H	H	A	H	-	-	H	A	B	H	H	B
EBS0033	H	H	A	H	-	H	A	B	A	A	H	H	H	H	B	B	A	B	H	A	H	H	H	B	H	B	A	H	-	H	H	H	H	A	H	H	H	H	H	B	H	-	-	A	H	A	H	H	B
EBS0038	H	H	H	H	H	H	H	B	B	B	H	H	H	A	B	B	H	A	H	A	H	H	B	B	B	H	B	H	A	H	B	B	B	A	H	H	H	B	H	A	H	-	A	A	A	B	H	B	B
EBS0039	B	H	H	H	-	B	H	A	H	B	H	A	A	B	B	A	H	A	B	H	B	A	H	B	H	B	H	A	H	H	B	H	A	A	B	H	A	A	B	H	A	-	-	A	H	B	B	H	B
EBS0040	H	H	A	H	A	H	A	B	A	A	H	H	H	H	B	B	A	B	H	A	H	H	H	B	H	B	H	H	H	-	H	H	H	A	H	H	H	H	H	B	H	-	-	A	H	A	H	H	B
EBS0042	A	B	H	H	H	B	H	H	B	H	A	H	H	H	H	A	H	H	H	H	A	H	H	H	H	H	A	H	B	H	A	H	H	H	H	H	B	H	H	H	B	-	B	B	H	H	A	H	A
EBS0044	H	H	H	A	A	A	H	H	A	H	H	B	B	H	B	H	A	B	B	H	A	H	B	H	B	A	A	A	H	H	A	H	H	A	H	H	B	H	H	H	H	-	B	H	H	A	A	-	H
EBS0046	A	B	H	H	B	B	H	H	B	B	A	-	H	A	B	H	A	B	H	A	H	H	H	H	H	A	B	A	A	H	H	B	H	H	H	B	H	B	H	A	H	-	A	H	H	B	H	H	B
EBS0048	A	B	H	H	B	B	H	H	B	B	A	-	H	A	B	H	A	B	H	A	H	H	H	H	H	A	B	A	A	H	H	B	H	H	H	B	-	B	H	-	H	-	A	H	H	B	-	H	B
EBS0049	-	B	B	B	H	H	B	B	H	A	H	H	H	B	A	H	B	B	H	H	B	H	H	H	H	H	H	H	B	B	H	H	B	H	H	B	B	H	H	B	H	-	-	H	B	H	H	H	B
EBS0050	H	A	H	A	H	H	B	A	H	A	B	H	B	H	B	B	H	H	H	B	A	A	A	A	B	B	H	H	H	H	H	H	B	A	B	H	H	A	A	B	A	-	B	H	H	B	-	H	B
EBS0051	B	H	A	H	H	B	H	H	H	A	A	H	H	-	H	H	B	H	H	B	A	H	B	H	A	H	H	H	H	H	H	B	H	H	H	A	A	B	A	H	H	-	B	H	A	A	B	-	H
EBS0055	B	B	B	B	H	H	B	B	H	A	H	B	H	B	A	H	B	B	H	H	B	H	H	H	H	H	A	H	B	B	H	H	B	H	H	B	B	H	H	B	H	-	-	H	B	H	H	H	B
EBS0056	B	H	H	A	A	H	H	H	A	H	H	B	H	H	B	A	A	B	B	B	A	H	H	H	B	A	H	-	A	H	A	H	H	A	H	H	H	-	-	H	H	-	B	B	H	A	A	H	H
EBS0057	B	H	H	B	H	B	H	H	A	A	H	H	B	A	H	B	B	B	H	B	H	B	H	B	H	H	B	H	-	H	H	H	A	A	H	A	H	H	H	H	-	-	B	B	A	H	B	B	-
EBS0058	A	H	H	-	H	-	H	H	B	H	A	-	H	H	H	A	H	H	H	H	A	H	H	H	H	H	H	H	B	H	A	B	H	H	H	H	H	A	H	H	B	-	-	H	H	H	A	H	H
EBS0059	A	A	H	A	A	H	H	A	A	H	H	H	B	H	B	B	A	H	A	H	A	A	H	H	B	H	A	H	H	H	A	A	B	H	H	B	H	A	B	B	H	-	-	H	H	H	A	A	H
EBS0060	-	B	H	H	B	H	H	B	B	-	H	H	H	A	B	B	H	A	H	A	A	A	B	B	H	A	B	H	A	H	B	B	B	A	H	B	A	B	H	A	H	-	-	A	A	B	H	H	B
EBS0063	-	H	A	H	A	H	A	B	A	A	H	H	H	H	B	H	A	H	H	A	H	H	H	B	H	H	H	H	H	H	B	A	H	A	H	H	H	H	H	B	H	-	-	B	H	A	H	H	B
EBS0066	A	H	H	H	H	H	H	H	B	H	H	H	A	A	B	A	H	H	H	H	A	H	B	B	A	H	A	H	-	-	A	B	A	H	B	B	H	A	H	A	A	-	A	A	A	H	H	A	H
EBS0067	A	B	H	H	H	B	H	H	B	H	A	H	H	H	H	A	H	H	H	H	A	H	H	H	H	H	A	H	-	-	A	H	H	H	H	H	B	H	H	H	B	-	-	H	H	H	A	H	A
EBS0068	A	H	H	-	-	H	-	H	B	H	H	H	A	A	B	A	H	H	H	H	A	H	B	B	A	H	A	H	B	H	A	B	A	H	B	B	H	A	H	-	A	-	-	A	A	H	H	A	H
EBS0069	A	B	H	B	H	B	H	H	B	H	A	H	H	H	H	A	H	H	H	H	A	H	H	H	H	H	A	H	B	-	A	H	H	H	H	H	B	H	H	H	B	-	B	H	H	H	A	H	A
EBS0071	H	B	B	H	A	B	H	B	H	H	H	H	A	B	A	B	H	B	H	H	B	H	H	B	H	H	-	H	H	-	B	H	B	H	H	B	H	H	A	H	H	-	-	H	B	H	H	B	H
EBS0072	H	H	A	H	A	H	A	B	A	A	H	H	H	H	B	H	A	H	H	A	H	H	H	B	H	H	H	H	H	H	B	H	H	A	H	H	H	H	H	B	H	-	-	B	H	A	H	H	B
EBS0074	A	B	H	-	H	B	-	H	B	H	A	H	H	H	H	A	H	H	H	H	A	H	H	H	H	H	A	H	B	H	A	B	H	H	H	H	B	H	H	H	B	-	-	H	H	H	A	H	A
EBS0076	A	H	H	H	H	H	H	H	B	H	H	H	A	A	B	A	H	H	H	H	A	H	B	B	A	H	A	B	B	H	A	B	A	H	B	B	H	A	H	A	A	-	A	A	A	H	H	A	H
EBS0077	H	H	H	H	A	A	A	B	B	B	-	H	A	A	H	H	A	A	H	B	A	H	B	H	A	H	A	B	H	H	A	B	A	H	B	H	B	A	H	A	A	-	A	A	A	H	H	A	H
EBS0080	B	B	B	B	H	H	B	B	H	A	H	H	H	B	A	H	B	B	H	H	B	H	H	H	H	H	A	H	B	B	H	H	B	H	H	B	B	H	H	B	H	-	A	H	B	H	H	H	B
EBS0081	H	H	H	H	H	H	H	B	B	H	H	H	H	A	B	B	H	A	H	A	H	H	B	B	B	H	B	H	A	H	B	B	B	A	H	H	H	B	H	A	H	-	A	H	A	B	H	B	B
EBS0082	H	A	B	B	A	B	H	B	-	A	H	-	B	H	H	B	B	H	H	A	B	B	H	B	H	H	B	B	A	B	H	H	A	A	H	A	H	H	H	H	H	-	H	H	A	B	B	B	A
EBS0083	H	H	A	H	H	A	A	H	A	A	B	H	H	H	B	H	A	H	H	A	H	H	H	B	A	H	H	B	H	H	B	A	H	A	H	H	H	H	H	B	H	-	-	B	H	A	H	H	H
EBS0084	H	H	A	A	-	A	H	H	H	B	H	H	H	A	B	H	A	B	H	H	H	A	A	B	H	H	B	A	A	B	H	H	H	B	A	H	A	B	B	H	A	-	-	A	A	A	H	H	A
EBS0085	B	H	A	A	H	H	H	B	A	A	A	H	H	A	H	H	H	H	B	B	A	H	H	H	B	A	H	H	H	A	H	H	H	A	H	A	A	H	A	H	H	B	B	B	H	A	B	A	H
EBS0086	H	B	H	H	B	H	H	B	B	-	H	H	H	A	B	B	H	A	H	A	A	A	B	B	H	A	B	A	A	H	B	B	B	A	H	B	A	B	H	A	H	-	A	A	A	B	H	H	B
EBS0089	B	A	H	-	H	B	H	A	H	B	H	A	A	B	B	A	H	A	B	H	B	A	H	B	H	B	H	A	H	H	B	H	A	A	B	H	A	A	H	H	A	-	B	A	H	B	B	A	B
EBS0090	A	A	H	A	A	H	H	A	A	H	H	H	B	H	-	B	A	H	H	H	A	A	H	H	B	H	A	H	H	H	A	A	B	H	H	B	H	H	B	B	H	-	-	H	H	H	A	A	H
EBS0091	B	B	B	B	H	H	B	B	B	A	H	-	B	B	A	H	B	H	H	B	B	B	H	H	A	H	A	H	B	-	H	H	B	H	H	B	B	B	H	H	B	-	A	H	B	H	H	H	B
EBS0092	-	H	H	H	H	H	H	B	B	B	H	H	H	A	B	B	H	A	H	A	H	H	B	B	B	H	B	H	A	-	B	B	B	A	H	H	H	B	H	A	H	-	-	A	A	B	H	B	B
EBS0093	A	B	H	H	B	B	H	H	B	B	A	-	H	-	B	H	A	B	H	A	H	H	H	B	H	A	B	A	H	A	H	B	H	H	H	B	H	B	H	A	H	-	A	H	H	B	H	H	B
EBS0095	A	B	H	B	H	B	H	H	B	H	A	H	H	H	H	A	H	H	H	H	A	H	H	H	H	H	A	H	B	H	A	H	H	H	H	H	B	H	H	H	B	-	B	H	H	H	A	H	A
EBS0096	B	H	H	H	H	B	H	A	H	B	H	A	A	B	B	A	H	A	B	H	B	A	H	B	H	B	H	A	-	-	B	H	A	A	B	H	A	A	B	H	A	-	-	A	H	B	B	H	B
EBS0097	A	B	H	H	B	H	H	B	B	B	H	H	H	A	B	B	H	H	H	A	A	H	H	B	H	A	B	A	-	-	B	B	B	A	H	B	H	H	H	A	H	-	-	H	A	B	H	H	B
EBS0098	B	H	H	B	H	B	H	H	A	A	H	-	B	-	H	B	B	B	H	B	H	B	H	B	H	H	B	H	-	-	H	H	A	A	H	A	H	H	H	H	H	-	B	B	A	H	B	B	A
EBS0101	H	H	H	A	A	A	H	H	A	H	H	-	B	H	B	H	A	B	-	-	A	H	B	H	B	A	A	A	H	-	A	H	H	A	H	H	B	H	H	H	H	-	B	H	H	A	A	H	H
EBS0104	H	B	H	H	B	H	H	B	B	B	H	H	H	A	B	B	H	H	H	A	A	H	H	B	H	A	B	A	A	-	B	B	B	A	H	B	A	H	H	A	H	-	-	H	A	B	H	H	B
EBS0105	A	B	B	H	-	B	A	H	B	H	A	H	H	H	B	-	A	H	B	-	H	H	H	H	H	B	A	B	-	-	-	H	B	H	H	B	H	H	H	B	H	-	B	B	H	B	H	H	B
EBS0107	A	H	H	H	H	H	-	H	B	H	H	H	A	A	B	A	H	H	H	H	A	H	B	B	A	H	A	H	-	-	A	B	A	H	B	B	H	A	H	A	A	-	-	A	A	H	H	A	H
EBS0109	B	H	A	B	H	B	H	H	H	H	H	-	B	A	B	B	H	B	H	H	H	H	H	H	H	H	B	B	A	H	A	H	H	A	H	A	A	H	B	H	H	-	-	B	A	H	B	B	A
EBS0110	H	H	A	H	A	A	A	B	H	B	B	A	A	A	H	H	A	H	H	B	A	H	B	H	A	H	A	H	H	-	H	B	A	H	B	H	H	H	H	H	H	-	A	A	A	B	H	H	H
EBS0112	-	H	A	A	H	H	H	B	A	A	A	H	-	A	H	H	H	H	H	B	A	H	B	H	A	A	H	H	H	-	H	H	H	A	H	A	A	H	A	H	H	-	B	H	A	A	B	A	H
EBS0113	H	H	H	H	H	H	H	H	B	H	H	H	A	A	B	A	H	H	H	H	A	H	B	B	A	H	A	B	B	H	A	B	A	B	B	B	H	A	H	A	A	-	-	A	A	H	H	A	H
EBS0114	A	B	H	B	H	B	H	H	B	H	A	H	H	H	H	A	H	H	H	H	A	H	H	H	H	H	A	H	B	H	A	H	H	H	H	H	B	H	H	H	B	-	B	H	H	H	A	H	A
EBS0116	A	B	H	H	B	H	H	B	B	B	H	H	H	A	B	B	H	H	H	A	A	H	H	H	H	A	B	A	A	H	H	B	B	A	H	B	H	H	H	A	H	-	-	H	A	B	H	H	B
EBS0118	A	B	H	B	H	H	A	H	B	H	A	-	H	H	H	A	H	H	H	B	A	B	H	H	H	H	B	H	H	H	A	B	H	H	H	H	H	A	H	H	B	-	B	H	H	H	A	A	H
EBS0119	-	H	H	H	H	H	H	H	-	H	H	H	A	A	B	A	H	H	H	H	A	H	B	B	A	H	A	B	B	-	A	B	A	H	B	B	H	A	H	A	A	-	-	A	A	H	H	A	H
EBS0120	-	H	H	H	H	H	H	B	B	H	H	-	H	A	B	B	H	A	H	A	H	H	B	B	B	H	B	H	-	-	B	B	B	A	H	H	H	B	H	A	H	-	-	H	A	B	H	B	B
EBS0123	B	A	H	H	H	B	H	A	H	B	H	A	A	B	B	H	H	A	B	H	B	A	H	B	H	B	H	A	H	H	B	H	A	A	B	H	A	A	H	H	A	-	-	A	H	B	B	A	B
EBS0124	B	H	H	H	H	H	H	H	H	B	A	-	H	H	H	B	H	B	H	H	B	A	H	H	H	H	H	H	A	A	A	A	H	A	H	A	A	-	B	H	B	-	B	H	H	A	B	H	H
EBS0126	H	H	A	H	B	A	H	H	H	B	H	B	H	A	B	H	A	B	H	H	H	A	A	B	H	H	B	A	H	-	H	H	H	B	A	B	A	B	H	H	A	-	A	A	A	A	H	H	A
EBS0128	-	H	H	H	H	H	H	H	B	H	H	H	A	A	B	A	H	H	H	H	A	H	B	B	A	H	A	B	B	-	A	B	A	H	B	B	H	A	H	A	A	-	A	A	A	H	H	A	H
EBS0130	B	H	H	B	-	B	H	H	A	A	H	-	B	H	H	B	B	B	H	A	B	B	H	B	H	H	B	H	A	B	H	H	A	A	H	A	H	H	H	H	H	-	-	H	A	B	B	B	A
EBS0132	H	H	H	H	H	H	H	H	B	H	H	H	A	A	B	A	H	H	H	H	A	H	B	-	A	H	A	B	B	H	A	B	A	B	B	B	H	A	H	A	A	-	A	A	-	H	H	A	H
EBS0133	H	A	H	H	B	H	B	A	H	A	H	H	B	H	H	B	H	H	B	B	A	H	A	A	B	B	H	H	H	H	H	H	H	A	B	H	H	H	A	B	A	-	B	H	H	H	H	H	B
EBS0134	B	H	A	B	H	B	H	H	H	H	H	-	B	A	B	B	H	B	H	H	H	H	H	H	H	H	B	B	A	H	A	H	H	A	H	A	A	H	B	H	H	-	B	B	A	H	B	B	A
EBS0137	A	B	B	H	H	B	A	H	B	H	A	H	H	H	B	A	A	H	B	A	H	H	H	H	H	B	A	B	B	H	A	H	H	H	H	B	B	H	H	B	H	-	B	B	H	B	H	H	B
EBS0140	H	H	B	-	A	H	H	B	H	A	H	-	H	B	A	H	B	B	H	H	B	H	H	H	H	H	H	H	B	-	H	H	B	H	H	B	B	H	A	B	H	-	-	H	B	A	H	H	H
EBS0142	B	B	B	B	H	H	B	B	H	A	H	-	H	B	A	H	B	B	H	H	B	H	H	H	H	H	A	H	B	B	H	H	B	H	H	B	B	H	H	B	H	-	-	H	B	H	H	H	B
EBS0143	A	B	H	H	B	H	H	H	B	B	H	H	H	A	B	B	H	H	H	A	A	H	H	H	H	A	B	A	-	H	H	B	B	A	H	B	H	H	H	A	H	-	-	H	A	B	H	H	B
EBS0144	H	B	H	H	B	H	H	B	B	B	H	H	H	A	B	B	H	A	H	A	A	A	B	B	H	A	B	H	A	H	B	B	B	A	H	B	A	B	H	-	H	-	-	A	A	B	H	H	B
EBS0146	B	H	H	B	H	B	H	H	A	A	H	-	B	A	H	B	B	B	H	B	H	H	H	B	H	H	B	H	A	H	H	H	A	A	H	A	H	H	H	H	H	-	B	B	A	H	B	B	A
EBS0147	B	H	A	A	H	B	H	H	H	A	A	H	H	A	H	H	H	-	H	B	A	H	B	H	A	A	H	H	H	H	H	B	H	H	H	A	A	H	A	H	H	-	B	H	A	A	B	A	H
EBS0148	H	H	H	H	H	H	H	B	B	B	H	H	H	A	B	B	H	A	H	A	A	A	B	B	B	H	B	H	A	H	B	B	B	A	H	H	A	B	H	A	H	-	A	A	A	B	H	B	B
EBS0149	B	A	H	H	H	B	H	A	H	B	H	A	A	B	B	H	H	A	B	H	B	A	H	B	H	B	H	A	H	H	B	H	A	A	B	H	A	A	H	H	A	-	H	A	H	B	B	A	B
EBS0150	-	B	H	H	B	H	H	B	B	B	-	H	H	A	B	B	H	H	H	A	A	H	H	B	H	A	B	A	A	-	B	B	B	A	H	B	A	H	H	A	H	-	A	H	A	B	H	H	B
EBS0151	H	H	H	A	H	H	H	A	H	B	H	H	H	H	B	A	H	H	H	A	H	A	A	B	H	B	B	A	A	B	H	H	H	B	A	H	A	B	B	H	A	-	A	A	A	H	B	H	A
EBS0152	H	H	A	H	H	A	A	H	A	A	B	H	H	H	B	-	A	H	H	A	H	H	H	B	A	H	H	B	H	H	B	A	H	A	H	H	H	H	H	B	H	-	H	B	H	A	H	H	H
EBS0153	H	A	H	A	B	H	B	A	H	A	H	H	B	H	H	B	H	H	H	B	A	A	A	A	B	B	H	H	H	H	H	H	B	A	B	H	H	A	A	B	A	-	-	H	H	H	H	H	B
EBS0154	B	H	H	B	H	B	H	H	A	A	H	-	B	A	H	B	H	B	H	B	H	H	H	H	H	H	B	H	A	H	H	H	A	A	H	A	H	H	B	H	H	-	B	B	A	H	B	B	A
EBS0155	H	H	H	-	-	-	A	A	A	H	H	B	B	H	B	H	A	B	B	H	A	H	B	H	B	A	-	-	H	H	A	H	H	H	A	H	B	H	H	B	H	-	-	H	H	A	A	H	H
EBS0156	H	H	B	H	A	H	H	B	H	A	H	-	H	B	A	H	B	B	H	H	B	H	H	B	H	H	H	H	B	B	H	H	B	H	H	B	B	H	A	B	H	-	-	H	B	A	H	H	H
EBS0157	H	B	H	H	B	H	H	B	B	B	H	H	H	A	B	B	H	H	H	A	A	H	B	B	H	A	B	A	A	H	B	B	B	A	H	B	A	B	H	A	H	-	-	H	A	B	H	H	B
EBS0159	H	A	H	A	A	H	B	A	H	A	B	B	B	H	B	B	A	H	H	B	A	A	H	A	B	B	H	H	H	H	H	H	B	H	H	H	H	H	H	B	A	-	-	H	A	H	A	H	B
EBS0160	-	H	H	A	A	H	H	H	A	H	H	B	H	H	B	A	A	H	B	B	A	H	H	H	B	A	H	A	A	H	H	H	H	A	H	H	H	H	H	H	H	-	-	B	H	A	B	H	H
EBS0162	H	H	H	A	-	A	-	A	H	B	H	H	H	A	B	H	H	B	H	H	H	A	A	B	H	H	B	A	A	B	H	H	H	B	A	H	A	B	B	H	A	-	A	A	A	A	B	H	A
EBS0163	B	H	H	B	H	B	H	H	H	A	H	-	B	A	H	B	H	B	H	B	H	H	H	H	H	H	B	H	A	H	A	H	H	A	H	A	H	H	B	H	H	-	B	B	A	H	B	B	A
EBS0164	A	B	H	H	B	H	H	B	B	B	H	H	H	A	B	B	H	H	H	A	A	H	H	B	H	A	B	A	A	H	B	B	B	A	H	B	A	H	H	A	H	-	-	H	A	B	H	H	B
EBS0166	A	B	H	B	H	B	H	H	B	H	A	H	H	H	H	A	H	H	H	H	A	H	H	H	H	H	A	H	B	H	A	H	H	H	H	H	B	H	H	H	B	-	B	H	H	H	A	H	A
EBS0167	A	H	H	H	H	H	H	H	B	H	H	H	A	A	B	A	H	H	H	H	A	H	B	B	A	H	A	B	B	H	A	B	A	H	B	B	H	A	H	A	A	-	-	A	A	H	H	A	H
EBS0169	-	-	H	B	H	B	H	H	B	H	A	H	H	H	H	A	H	H	H	H	A	H	H	H	H	H	A	H	B	-	A	H	H	H	H	H	B	H	H	H	B	-	B	H	H	H	A	H	A
EBS0171	B	H	B	B	A	H	B	B	H	A	H	-	H	B	A	H	B	B	H	H	B	H	H	H	H	H	H	H	B	B	H	H	B	H	H	B	B	H	H	B	H	-	A	H	B	H	H	H	H
EBS0172	B	B	B	B	H	B	B	B	B	A	H	H	B	B	A	B	B	H	H	B	B	B	H	H	A	A	A	A	B	-	H	H	B	H	H	B	B	B	A	H	B	-	-	H	B	H	B	H	B
EBS0173	-	H	H	A	A	A	A	H	A	H	H	B	B	H	B	H	A	B	B	H	A	H	B	H	B	A	A	A	H	H	H	H	B	H	A	H	B	H	H	B	H	-	B	H	H	A	A	H	H
EBS0174	A	A	H	A	A	H	H	A	A	H	H	H	B	H	H	B	A	H	A	H	A	A	H	H	B	H	A	H	H	H	A	H	B	H	H	B	A	A	B	B	H	-	-	H	H	H	A	A	H
EBS0175	B	B	B	B	H	H	B	B	H	A	H	H	H	B	-	H	B	B	H	H	B	H	H	H	H	H	A	H	B	B	H	H	B	H	H	B	B	H	H	B	H	-	A	H	B	H	H	H	B
EBS0176	B	H	H	B	H	B	-	H	A	A	H	-	B	A	H	B	B	B	H	B	H	B	H	B	H	H	B	H	A	-	H	H	A	A	H	A	H	H	H	H	H	-	B	B	A	H	B	B	A
EBS0177	B	H	A	A	-	H	H	B	A	A	A	H	H	A	H	H	H	H	H	B	A	H	B	H	A	A	H	H	H	-	H	H	H	A	H	A	A	H	A	H	H	-	B	H	A	A	B	A	H
EBS0178	H	B	H	H	B	H	H	B	B	B	H	H	H	A	B	B	H	H	-	A	A	H	B	B	H	A	B	A	A	-	B	B	B	A	H	B	A	B	H	A	H	-	-	H	A	B	H	H	B
EBS0179	H	H	A	H	A	H	A	B	A	A	H	H	H	H	B	B	A	B	H	A	H	H	H	B	H	B	A	H	H	-	H	H	H	A	H	H	H	H	H	B	H	-	-	A	H	A	H	H	B
EBS0183	B	H	H	H	-	-	H	-	H	-	H	-	A	H	B	A	H	A	B	-	B	-	H	B	A	B	H	A	H	-	B	H	A	H	-	H	A	A	B	H	A	-	-	A	A	B	B	H	H
EBS0184	B	B	B	B	H	B	B	B	B	A	H	H	B	B	A	B	B	H	H	B	B	B	H	H	A	H	A	A	B	-	H	H	B	H	H	B	B	B	H	H	B	-	A	H	B	H	B	H	B
EBS0186	H	H	A	H	-	H	A	B	A	A	H	H	H	H	B	B	A	B	H	A	H	H	H	B	H	B	H	H	H	H	H	H	H	A	H	H	H	H	H	B	H	-	-	A	H	A	H	H	B
EBS0187	H	H	H	H	H	H	H	A	H	B	H	H	H	H	B	A	H	A	H	A	H	A	A	B	H	B	B	A	A	B	H	H	H	B	H	H	A	B	B	H	A	-	A	A	A	B	B	H	A
EBS0188	B	H	H	H	H	B	B	A	H	B	A	A	H	B	H	H	H	A	B	H	B	A	H	B	H	B	A	A	H	H	B	A	A	A	H	H	B	A	H	H	A	-	-	A	H	B	H	A	B
EBS0189	H	B	H	H	-	H	H	B	B	B	H	H	H	A	B	B	H	H	H	A	A	H	B	B	H	A	B	A	A	H	B	B	B	A	H	B	A	B	H	A	H	-	A	H	A	B	H	H	B
EBS0191	H	B	H	H	B	H	H	B	B	B	H	H	H	A	B	B	H	H	H	A	A	H	B	B	H	A	B	A	A	H	B	B	B	A	H	B	A	B	H	A	H	-	-	H	A	B	H	H	B
EBS0192	A	B	B	H	-	B	-	H	B	H	-	H	-	H	B	A	A	A	B	-	H	H	-	H	H	B	A	B	B	H	-	H	B	H	-	H	H	H	H	B	H	-	-	B	H	B	H	H	B
EBS0195	B	B	B	B	H	H	B	B	B	A	-	-	B	B	-	H	B	B	H	H	B	B	H	H	-	H	-	H	B	B	H	H	B	H	H	B	B	B	H	H	H	-	A	H	B	H	H	H	B
EBS0196	A	B	H	B	H	B	H	H	B	H	A	H	H	H	H	A	H	H	H	H	A	H	H	H	H	H	A	H	B	H	A	H	H	H	H	-	B	H	H	H	B	-	B	H	H	H	A	H	A
EBS0197	H	H	H	B	B	A	A	H	A	A	B	H	H	B	B	B	H	A	A	H	H	H	B	B	A	H	H	H	H	H	B	A	A	A	H	A	H	A	H	B	H	-	A	B	H	H	H	H	H
EBS0198	B	H	H	B	H	B	H	H	A	A	H	-	B	A	H	B	B	B	H	B	H	B	H	B	H	H	B	H	A	H	H	H	A	A	H	A	H	H	H	H	H	-	B	B	A	H	B	B	A
EBS0200	H	B	B	H	A	B	A	B	H	H	H	A	A	B	A	B	H	B	H	H	H	H	H	B	H	H	A	H	H	H	B	B	B	B	A	H	H	H	A	H	H	-	-	H	B	H	H	B	H
EBS0201	H	H	A	H	H	A	A	H	A	A	B	H	H	H	B	H	A	H	H	A	H	H	H	B	A	H	H	B	H	H	B	A	H	A	H	H	H	H	H	B	H	-	-	B	H	A	H	H	H
EBS0202	H	H	B	H	A	H	H	B	H	H	H	H	H	B	A	B	H	B	H	H	B	H	H	B	H	H	A	H	H	H	H	H	B	H	H	B	H	H	A	B	H	-	A	H	B	H	H	H	H
EBS0205	B	H	H	H	H	B	B	A	H	B	A	A	H	B	H	H	H	A	B	H	B	A	H	B	H	B	A	A	H	H	B	A	A	A	H	H	B	A	H	H	A	-	H	A	H	B	H	A	B
EBS0206	H	B	B	H	A	B	A	H	B	H	A	H	H	A	B	A	A	A	B	A	H	H	A	H	H	B	A	B	B	H	A	H	B	H	A	H	H	H	H	B	H	-	-	B	H	B	H	H	B
EBS0207	B	H	H	B	H	B	H	-	A	A	H	-	B	A	H	B	B	B	H	B	H	B	H	B	H	H	B	H	A	B	H	H	A	A	H	A	H	H	H	H	H	-	B	B	A	H	B	B	A
EBS0209	A	B	-	H	B	H	H	B	B	B	H	H	H	A	B	B	H	H	H	A	A	H	H	B	H	-	B	A	A	H	B	B	B	A	H	B	A	H	H	A	H	-	-	H	A	B	H	H	B
EBS0210	H	B	H	H	B	H	H	B	B	B	H	H	H	A	B	B	H	H	H	A	A	H	B	B	H	A	B	A	A	H	B	B	B	A	H	B	A	B	H	A	H	-	A	H	A	B	H	H	B
EBS0211	B	A	B	B	H	B	H	H	A	A	H	-	B	H	H	B	B	H	H	A	B	B	H	B	H	H	B	H	A	B	H	H	A	A	H	A	H	H	H	H	H	-	H	H	A	B	B	B	A
EBS0212	H	H	A	H	-	A	A	H	A	A	B	H	H	H	B	H	A	H	H	A	H	H	B	B	A	H	H	B	H	H	B	A	H	A	H	H	H	H	H	B	H	-	-	B	H	A	H	H	H
EBS0216	A	A	H	A	A	H	H	A	A	H	H	H	B	H	B	B	A	H	H	H	A	A	H	H	B	H	A	H	H	H	A	A	B	H	H	B	H	H	B	B	H	-	H	H	H	H	A	A	H
EBS0217	H	H	A	H	H	A	A	H	A	A	B	H	H	H	B	H	A	H	H	A	H	H	H	B	A	H	H	B	H	H	B	A	H	A	H	H	H	H	H	B	H	-	-	B	H	A	H	H	H
EBS0218	A	A	H	A	A	H	H	A	A	H	H	H	B	H	B	B	A	H	H	H	A	A	H	H	B	H	A	H	H	H	A	A	B	H	H	B	H	A	B	B	H	-	-	H	H	H	A	A	H
EBS0220	H	H	H	B	B	A	A	H	A	H	B	H	A	B	B	B	H	A	A	H	H	H	B	B	A	H	H	H	H	H	B	A	A	A	H	A	H	A	H	B	H	-	A	B	H	H	H	A	H
EBS0222	B	H	H	B	H	B	H	H	A	A	H	-	B	H	H	B	B	B	H	A	B	B	H	B	H	H	B	H	A	B	H	H	A	A	H	A	H	H	H	H	H	-	-	H	A	B	B	B	A
EBS0224	H	H	H	B	B	A	A	H	A	A	B	H	H	H	B	B	H	A	A	H	H	H	B	B	A	H	H	H	H	H	B	A	A	A	H	A	H	A	H	B	H	-	-	B	H	H	H	H	H
EBS0226	A	B	H	H	B	H	H	H	B	B	H	H	H	A	B	B	H	H	H	A	A	B	H	H	H	A	B	A	A	H	H	B	B	H	H	B	H	B	H	A	H	-	A	H	H	B	H	H	B
EBS0227	B	H	H	H	H	B	H	A	H	B	-	A	H	H	B	A	H	A	B	H	B	A	-	B	H	B	H	A	H	H	B	H	A	H	B	H	-	-	B	H	A	-	-	-	A	B	B	H	B
EBS0229	H	H	A	H	A	H	-	B	A	A	H	H	H	H	B	B	A	B	H	-	H	H	H	B	H	B	H	H	H	-	H	H	H	A	H	H	H	H	H	B	H	-	-	A	H	-	H	H	B
EBS0231	B	H	A	H	H	B	H	H	H	A	A	H	H	A	H	H	H	H	H	B	A	H	B	H	A	H	H	H	H	H	H	B	H	H	H	A	A	H	A	H	H	-	B	H	A	A	B	-	H
EBS0232	H	B	H	H	-	H	H	B	B	B	H	H	H	A	B	B	H	H	H	A	A	H	H	B	H	A	B	A	A	H	B	B	B	A	H	B	A	H	H	A	H	-	A	H	A	B	H	H	B
EBS0233	H	B	H	H	-	H	H	B	B	B	H	H	H	A	B	B	-	H	H	A	A	H	B	B	H	A	B	A	A	H	B	B	B	A	H	B	A	B	H	A	H	-	A	H	A	B	H	H	B
EBS0235	B	H	H	A	H	H	H	B	A	H	A	H	H	A	B	H	H	H	B	B	A	H	H	H	B	A	H	H	H	A	H	H	H	A	H	A	H	H	A	H	H	-	B	B	H	A	B	A	H
EBS0236	H	H	H	H	-	H	H	B	B	B	H	H	H	A	B	B	H	A	H	A	A	A	B	B	B	H	B	H	A	H	B	B	B	A	H	B	A	B	H	A	H	-	A	A	A	B	H	H	B
EBS0237	H	H	A	H	-	H	A	B	A	A	H	-	H	H	B	H	A	H	H	A	H	H	-	B	A	H	H	B	H	H	B	A	H	A	H	H	H	H	H	B	H	-	-	B	H	A	H	H	B
EBS0239	B	H	H	B	-	B	H	H	H	A	H	-	B	A	H	B	H	B	H	B	H	H	H	H	H	H	B	H	A	H	A	H	H	A	H	A	H	H	B	H	H	-	B	B	A	H	B	B	A
EBS0240	H	H	A	A	A	A	A	B	H	B	B	A	A	A	H	A	A	H	H	B	A	B	B	H	A	B	A	A	H	H	B	B	A	H	B	H	H	H	H	H	H	-	A	A	A	B	H	H	H
EBS0241	-	H	H	B	H	H	H	H	H	H	A	-	-	H	B	B	H	B	H	H	H	H	H	H	H	H	B	B	A	H	A	H	H	A	H	A	A	H	B	H	H	-	B	B	A	A	-	B	H
EBS0242	B	H	H	H	H	B	H	A	H	B	H	-	A	H	B	A	H	A	B	H	B	A	H	B	A	B	H	A	H	H	B	H	A	H	B	H	A	A	B	H	A	-	-	A	A	B	-	H	B
EBS0244	B	H	H	H	H	H	H	-	H	-	H	-	H	H	B	A	H	A	B	A	B	A	H	B	A	B	B	A	H	-	H	H	A	H	H	H	A	A	B	H	A	-	A	A	A	B	B	H	H
EBS0245	B	H	H	H	H	B	B	A	H	B	A	A	H	B	H	H	H	A	B	H	B	A	H	B	H	B	H	A	H	H	B	A	A	A	H	H	B	A	H	H	A	-	-	A	H	B	H	A	B
EBS0246	H	B	H	H	B	H	H	B	B	B	H	H	H	A	B	B	H	H	H	A	A	H	H	B	H	A	B	A	A	H	B	B	B	A	H	B	A	H	H	A	H	-	-	H	A	B	H	H	B
EBS0247	H	B	A	A	H	H	B	B	H	B	B	A	H	A	H	A	A	H	H	B	H	B	B	H	H	B	A	A	H	H	B	B	H	H	H	H	H	H	H	H	B	-	A	A	A	B	H	H	B
EBS0248	A	B	H	B	H	B	H	H	B	H	A	H	H	H	H	A	H	H	H	H	A	H	H	H	-	H	A	H	B	H	A	H	H	H	H	H	B	H	H	H	B	-	-	H	H	H	A	H	A
EBS0249	H	A	H	A	H	H	B	A	H	A	B	-	B	H	B	B	H	H	H	B	A	A	H	A	B	B	H	H	H	H	H	H	B	H	B	-	H	A	H	B	A	-	B	H	A	H	A	H	B
EBS0250	A	H	H	H	H	H	H	H	B	H	H	H	A	A	B	A	H	H	H	H	A	H	B	B	-	H	A	B	B	H	A	B	A	H	B	B	H	A	H	A	A	-	-	A	A	H	H	A	H
EBS0251	A	B	H	H	B	H	H	B	B	B	H	H	H	A	B	B	H	H	H	A	A	H	H	B	-	A	B	A	A	H	B	B	B	A	H	B	A	H	H	A	H	-	A	H	A	B	H	H	B
EBS0252	-	H	H	B	H	A	A	H	A	A	B	H	H	H	B	H	A	H	A	H	H	H	B	B	A	H	H	H	H	H	B	A	A	A	H	A	H	H	H	B	H	-	A	B	H	A	H	H	H
EBS0253	B	H	-	B	H	B	H	H	A	A	H	-	B	A	H	B	B	B	H	B	H	H	H	B	H	H	B	H	A	H	H	H	A	A	H	A	H	H	H	H	H	-	-	B	A	H	B	B	A
EBS0254	A	H	H	H	H	H	H	H	B	H	H	H	A	A	B	A	H	H	H	H	A	H	B	B	A	H	A	B	B	H	A	B	A	H	B	B	H	A	H	A	A	-	-	A	A	H	H	A	H
EBS0255	A	A	B	A	A	H	B	A	H	H	B	-	B	H	B	B	A	H	H	B	A	A	H	H	B	B	H	H	H	H	H	A	B	H	H	H	H	H	H	B	H	-	-	H	A	H	A	H	B
EBS0257	H	H	A	H	A	H	A	B	A	A	H	H	H	H	B	B	A	H	H	A	H	H	H	B	H	H	H	H	H	H	H	H	H	A	H	H	H	H	H	B	H	-	-	H	H	A	H	H	B
EBS0258	B	H	H	H	H	B	H	A	H	B	H	A	A	H	B	A	H	A	B	H	B	A	H	B	H	B	H	A	H	H	B	H	A	H	B	H	A	A	B	H	A	-	H	A	A	B	B	H	B
EBS0259	H	H	H	B	B	A	A	H	A	A	B	H	H	H	B	B	A	A	A	H	H	H	B	B	A	H	H	H	H	-	B	A	A	A	H	A	H	A	H	B	H	-	A	B	H	H	H	H	H
EBS0260	B	A	H	H	H	B	H	A	H	B	H	A	A	B	B	A	H	A	B	H	B	A	H	B	H	B	H	A	H	-	B	H	A	A	B	H	A	A	H	H	A	-	H	A	H	B	B	A	-
EBS0263	H	H	H	H	H	H	A	B	B	B	H	H	A	A	B	A	H	H	H	H	A	H	B	B	A	H	A	B	B	-	A	B	A	B	B	B	H	A	A	A	A	-	-	A	A	H	H	A	H
EBS0264	H	H	H	B	B	A	A	H	A	A	B	H	H	H	B	B	H	A	A	H	H	H	B	B	A	H	H	H	H	-	B	A	A	A	H	A	H	A	H	B	H	-	A	B	H	H	H	H	H
EBS0265	H	A	H	A	H	H	B	A	H	A	B	H	B	H	B	B	H	H	H	B	A	A	H	A	B	B	H	H	H	H	H	H	B	H	B	H	H	A	H	B	A	-	B	H	A	H	A	H	B
EBS0267	H	A	B	A	A	H	B	A	H	H	B	H	B	H	B	B	A	H	H	B	A	A	H	A	B	B	H	H	H	H	H	H	B	H	H	H	H	H	H	B	H	-	-	H	A	H	A	H	B
EBS0268	A	H	H	H	H	H	H	H	B	H	H	H	A	A	B	A	H	H	H	H	A	H	B	B	A	H	A	B	B	H	A	B	A	H	B	B	H	A	H	A	A	-	A	A	A	H	H	A	H
EBS0269	B	H	H	H	H	B	B	A	H	B	A	A	H	B	H	H	H	A	B	H	B	A	H	B	H	B	A	A	H	H	B	A	A	A	H	H	H	A	H	H	A	-	-	A	H	B	H	A	B
EBS0271	B	B	B	B	H	H	B	B	H	A	H	-	H	B	A	H	B	B	H	H	B	H	H	H	H	H	A	H	B	B	H	H	B	H	H	B	B	H	H	B	H	-	-	H	B	H	H	H	B
EBS0275	-	A	H	H	H	B	B	A	H	B	H	-	A	B	H	H	H	-	B	H	B	A	H	B	H	B	H	A	H	H	B	A	A	A	H	H	A	A	H	H	A	-	-	A	H	B	-	A	B
EBS0277	H	H	H	H	H	H	H	B	B	H	H	H	H	H	B	B	H	A	H	A	H	H	B	B	B	-	B	H	A	H	B	B	B	A	H	H	H	B	H	A	H	-	A	H	H	B	H	H	H
EBS0278	A	B	H	H	B	H	H	B	B	B	H	H	H	A	B	B	H	H	H	A	A	H	H	B	H	A	B	A	A	H	B	B	B	A	H	B	H	H	H	A	H	-	-	H	A	B	H	H	B
EBS0279	A	-	H	B	H	B	H	H	B	H	A	H	H	H	H	A	H	H	H	H	A	H	H	H	H	H	A	H	B	H	A	H	H	H	H	H	B	H	H	H	B	-	B	H	H	H	-	H	A
EBS0280	B	H	A	B	-	B	H	H	H	H	H	B	B	A	B	B	H	B	H	H	H	-	H	H	H	H	B	B	A	H	A	H	H	A	H	A	A	H	B	H	H	-	B	B	A	H	B	-	-
EBS0282	B	H	H	A	H	H	H	B	A	H	H	-	H	A	B	H	H	H	B	B	A	H	H	H	B	A	H	H	H	A	H	H	H	A	H	A	H	H	A	H	H	-	-	B	H	A	B	A	H
EBS0287	H	A	H	H	B	H	B	A	H	A	H	H	B	H	H	B	H	H	B	B	A	H	A	A	B	B	H	H	H	H	H	H	H	A	B	H	H	H	A	H	A	-	B	H	H	H	H	H	B
EBS0290	B	H	A	B	H	B	H	H	H	H	H	-	B	A	B	B	H	B	H	H	H	H	H	H	H	H	B	B	A	H	A	H	H	A	H	A	A	H	B	H	H	-	B	B	A	H	B	B	A
EBS0292	B	H	H	-	H	B	H	H	A	A	H	-	B	A	H	B	B	B	H	B	B	B	H	B	H	H	B	H	A	B	H	H	A	A	H	A	H	H	H	H	H	-	B	B	A	B	B	B	A
EBS0293	B	H	H	B	H	B	H	H	A	A	H	-	B	A	H	B	B	B	H	B	H	B	H	B	H	H	B	H	A	B	H	H	A	A	H	A	H	H	H	H	H	-	B	B	A	H	B	B	A
EBS0297	-	H	H	H	H	H	A	H	B	B	H	H	A	A	B	A	H	H	H	H	A	H	B	B	A	H	A	B	B	-	A	B	A	B	B	B	H	A	H	A	A	-	-	A	A	H	H	A	H
EBS0298	H	H	A	H	A	A	A	B	H	B	B	A	A	A	H	H	A	A	H	B	A	H	B	H	A	H	A	H	H	H	H	B	A	H	B	H	H	H	H	H	H	-	A	A	A	B	H	A	H
EBS0299	B	H	H	B	H	B	H	H	A	A	H	-	B	A	H	B	B	B	H	H	B	B	H	B	H	H	B	H	A	B	H	H	A	A	H	A	H	H	H	H	H	-	B	B	A	B	B	B	A
EBS0302	-	H	H	H	H	H	H	H	H	B	A	B	H	H	H	B	H	B	H	H	B	A	H	H	A	H	H	H	A	A	A	A	H	A	A	A	-	H	B	H	B	-	-	H	A	A	B	H	H
EBS0304	H	H	A	H	H	A	A	H	-	A	B	H	H	H	B	H	A	H	H	A	H	H	H	B	A	H	H	B	H	H	B	A	H	-	H	H	H	H	H	B	H	-	-	B	H	A	H	H	H
EBS0305	B	H	H	B	H	B	H	H	A	A	H	-	B	A	H	B	B	-	H	H	B	B	H	B	H	H	B	H	A	B	H	H	A	A	H	A	H	H	H	H	H	-	B	B	A	B	B	B	A
EBS0306	-	B	H	H	B	B	H	H	B	B	A	A	H	A	B	H	A	B	H	A	H	H	H	B	H	A	B	A	H	-	H	B	-	H	H	B	H	B	H	A	H	-	-	H	H	B	H	H	B
EBS0307	B	H	H	H	H	B	H	A	H	B	H	A	A	B	B	A	H	A	B	H	B	A	H	B	H	B	H	A	H	H	B	H	A	H	B	H	A	A	B	H	A	-	-	A	A	B	B	H	B
EBS0308	-	H	A	H	A	H	A	B	A	A	H	H	-	H	B	H	A	H	H	A	H	H	H	B	-	H	H	H	-	H	B	A	H	A	H	H	H	H	H	B	H	-	-	B	H	A	H	H	B
EBS0309	H	A	B	A	A	H	B	A	H	H	B	-	B	H	B	B	A	H	H	B	A	A	H	A	B	B	H	H	H	-	H	H	B	H	H	H	H	H	H	B	H	-	-	H	A	H	A	H	B
EBS0310	H	H	H	H	-	H	H	B	B	B	H	H	H	A	B	B	H	A	H	A	A	A	B	B	B	H	B	H	A	-	B	B	B	A	H	B	A	B	H	A	H	-	-	A	A	B	H	B	B
EBS0312	H	A	H	H	B	H	B	A	H	A	H	H	B	H	H	B	H	H	B	B	A	H	A	A	B	B	H	H	H	-	H	H	H	A	B	H	H	H	A	H	A	-	B	H	H	H	H	H	B
EBS0313	B	B	B	B	H	B	B	B	B	A	H	H	B	B	A	B	B	H	H	B	B	B	H	H	A	H	A	A	B	B	H	H	B	H	H	B	B	B	-	H	B	-	-	H	B	H	B	H	B
EBS0314	H	H	H	B	B	A	A	H	A	A	B	H	H	H	B	B	H	A	A	H	H	H	B	B	A	H	H	H	H	H	B	A	A	A	H	A	H	A	H	B	H	-	A	B	H	H	H	H	H
EBS0316	A	B	H	H	H	B	H	H	B	H	A	H	H	H	H	A	H	H	B	H	A	H	H	H	H	H	A	H	B	H	A	H	H	H	H	H	B	H	H	H	H	-	B	B	H	H	H	H	A
EBS0319	H	H	H	A	A	A	A	H	A	H	H	B	B	B	H	H	A	B	B	A	A	H	B	B	B	A	A	A	H	H	H	H	B	H	A	B	B	H	H	B	H	-	B	H	H	A	A	H	H
EBS0320	A	H	H	H	H	H	H	H	B	H	H	H	A	A	B	A	H	H	H	H	A	H	B	B	A	H	A	B	B	H	A	B	A	H	B	B	H	A	H	A	A	-	A	A	A	H	H	A	H
EBS0321	B	B	B	B	-	B	H	B	B	A	H	H	B	B	A	B	B	H	H	B	H	B	H	H	A	A	A	A	B	H	H	H	H	H	H	B	B	B	A	H	B	-	A	H	B	H	B	H	B
EBS0322	A	H	H	H	H	H	H	H	B	H	H	H	A	A	B	A	H	H	H	H	A	H	B	B	A	H	A	H	B	H	A	B	A	H	B	B	H	A	H	A	A	-	-	A	A	H	H	A	H
EBS0323	H	H	H	H	H	A	A	B	B	B	B	H	A	A	B	A	H	H	H	H	A	H	B	B	A	H	A	B	B	H	A	B	A	B	B	B	B	A	A	A	A	-	A	A	A	H	H	A	H
EBS0324	H	B	H	H	B	H	H	B	B	B	H	H	H	A	B	B	H	H	H	A	A	H	B	B	H	A	B	A	A	H	B	B	-	A	H	B	A	B	H	A	H	-	-	H	A	B	H	H	B
FB00001	-	A	H	H	B	H	B	A	H	A	H	H	B	H	H	B	H	H	B	B	A	H	A	A	B	B	H	H	H	H	H	H	H	A	B	H	H	H	A	H	A	B	B	H	H	H	H	H	B
FB00002	A	B	H	H	H	B	H	H	B	H	A	H	H	H	H	A	H	H	H	H	A	H	H	H	H	H	A	H	B	H	A	H	H	H	H	H	B	H	H	H	B	H	B	H	H	H	A	H	A
[truncated: 136 more columns]
